# Supplementary material for: Preparation and folic acid conjugation of fluorescent polymer nanoparticles for cancer cell targeting
Source: Royal Society of Chemistry journal article supplement (doi:10.1039/c2jm30618b), 2012-01-01
Supplement: c2jm30618b.pdf [file c2jm30618b.pdf]

## **Supporting Information**

# **Preparation and folic acid conjugation of fluorescent polymer nanoparticles for cancer cell targeting**

Xinxin Qiang,<sup>a</sup> Tong Wu,<sup>a</sup> Jiangli Fan,<sup>a</sup> Jingyun Wang,<sup>b</sup> Fengling Song,<sup>a</sup> Shiguo Sun,<sup>a</sup>  
Xiaojun Peng\*

<sup>a</sup> State Key Laboratory of Fine Chemicals, <sup>b</sup> School of Life Science and  
Biotechnology, Dalian University of Technology,  
2 Linggong Road, 116024 Dalian, China

\* Corresponding author: pengxj@dlut.edu.cn

## **Contents**

**NMR spectral of synthesized dyes**

**Optical spectral of dye 4**

**Images of the fNPs emulsion**

**FT-IR spectra of NPs**

**Zeta potential of NPs**

**Cytotoxicity of FANPs**

**Confocal images and flow cytometer measurement**

### NMR spectral of synthesized dyes.

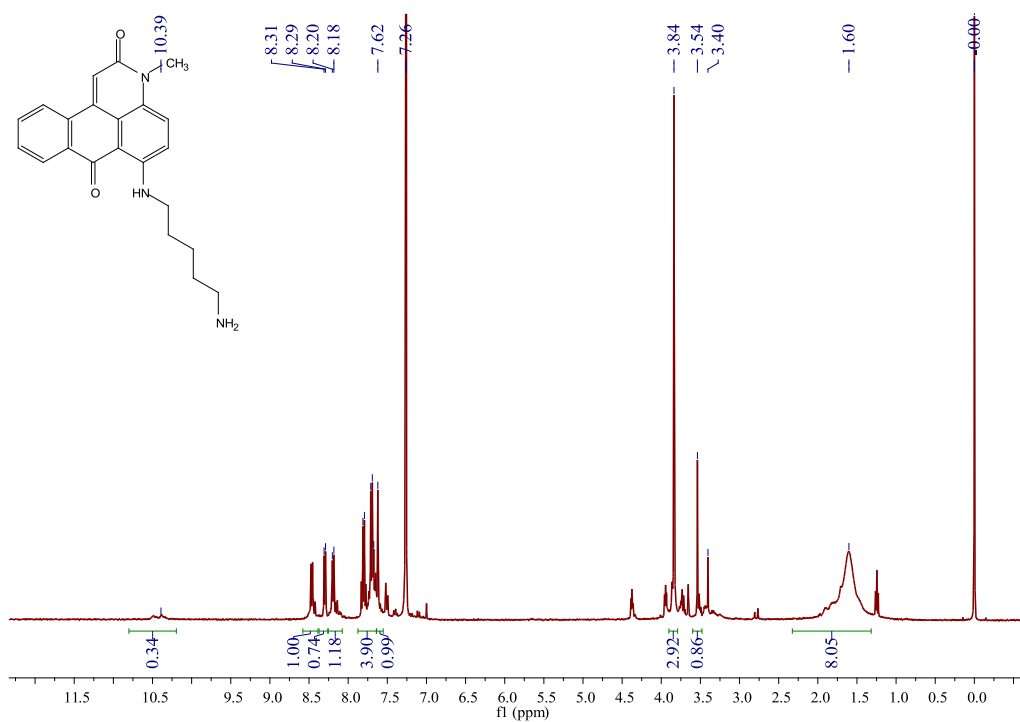

Fig. S1 <sup>1</sup>H-NMR spectra of dye 2.

a)

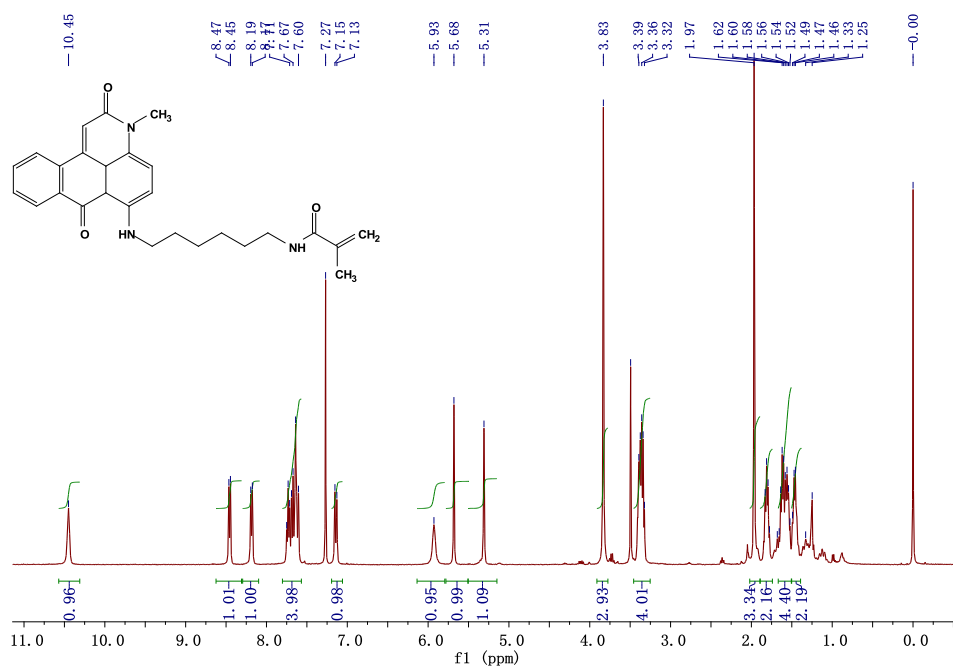

b)

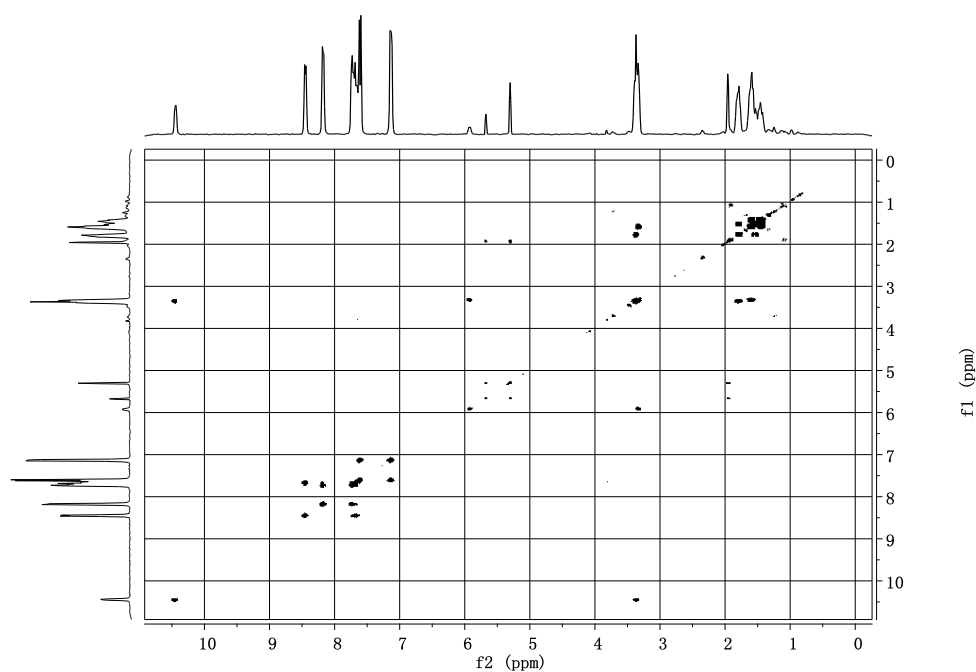

Fig. S2 NMR spectra of dye 3 a)  $^1\text{H}$ -NMR; b)  $^1\text{H}$ - $^1\text{H}$  COSY.

a)

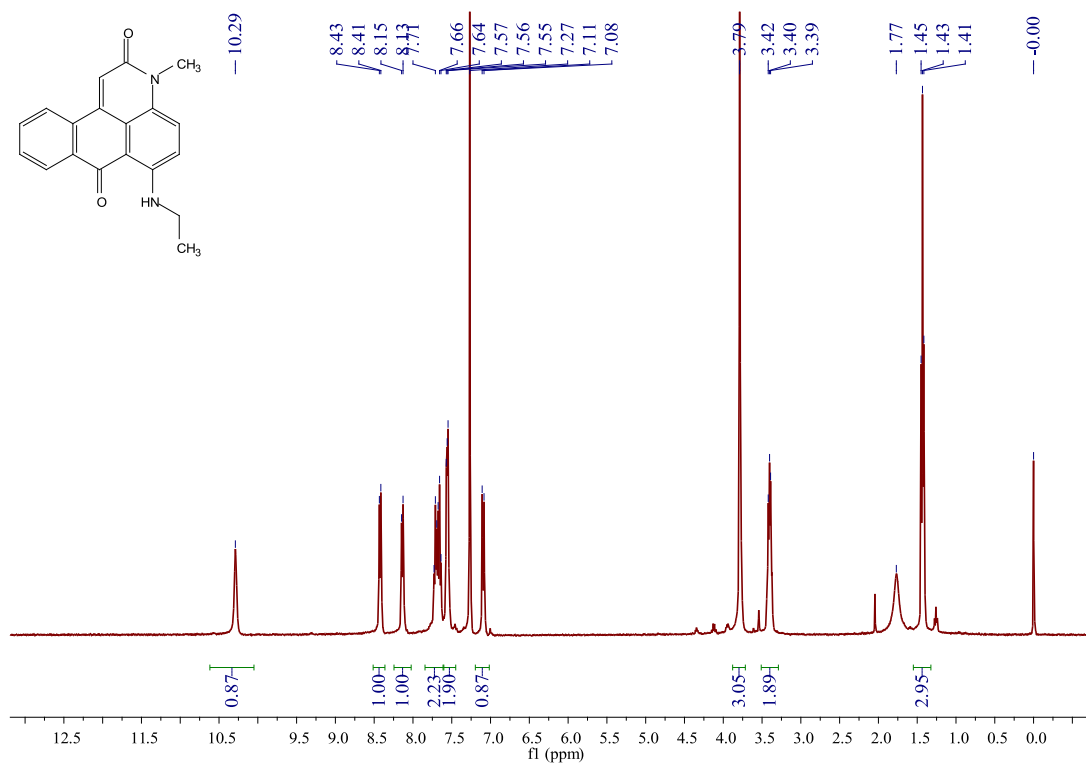

b)

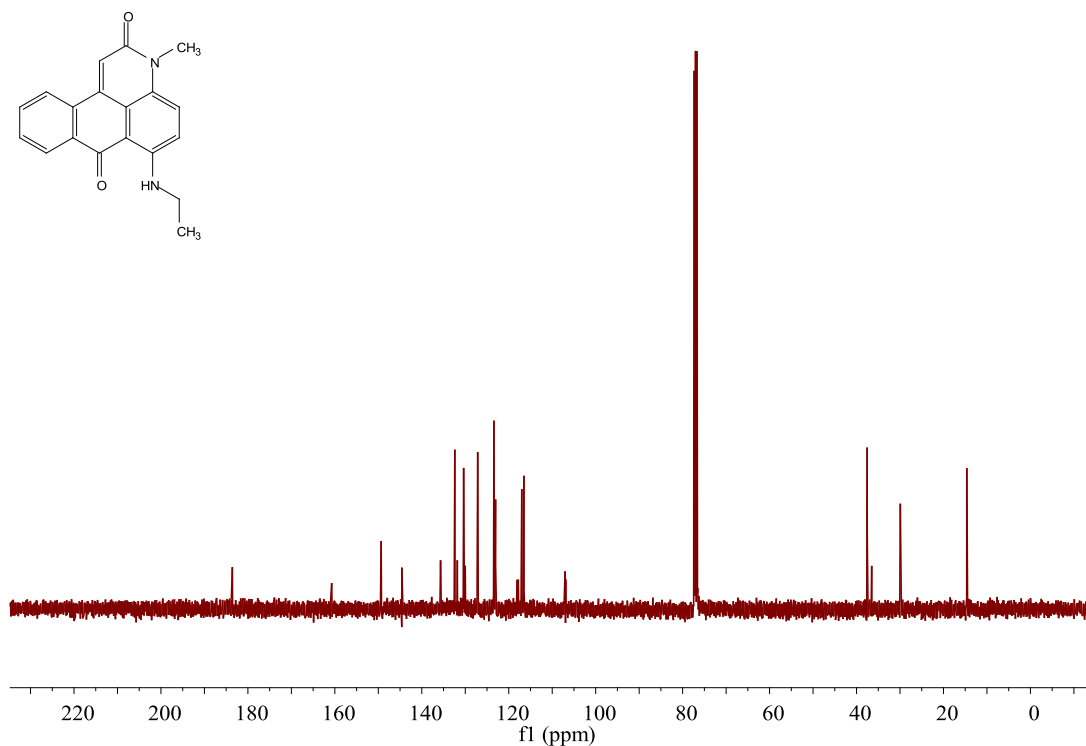

Fig. S3 NMR spectra of dye 4 a) <sup>1</sup>H-NMR; b) <sup>13</sup>C-NMR.

#### Optical spectral of dye 4

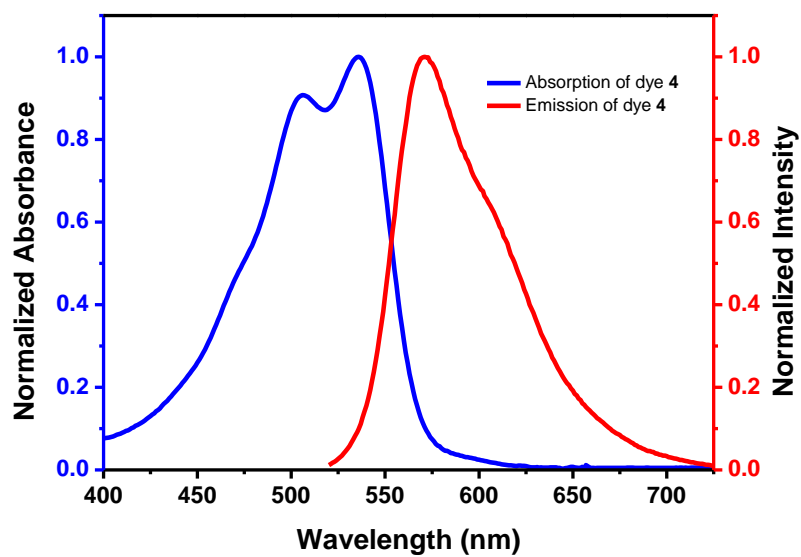

Fig. S4 Normalized absorption and emission of dye 4 in ethanol.

### Images of the fNPs emulsion

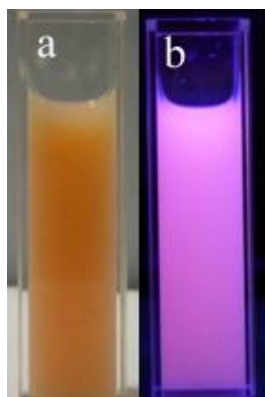

Fig. S5 Images of the fNPs emulsion illuminated by a) sunlight; b) 365 nm of UV light.

### FT-IR spectra of NPs

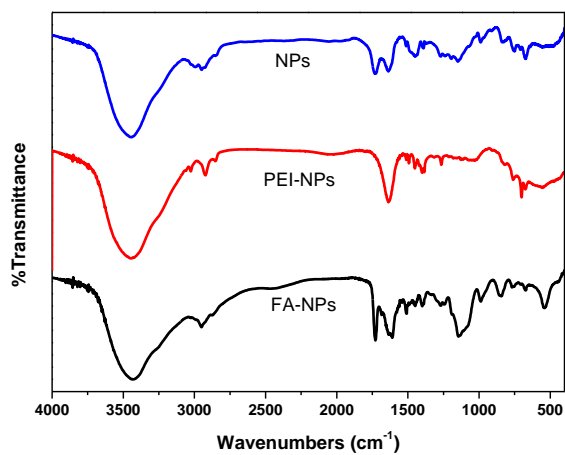

Fig. S6 FT-IR spectra of NPs.

### Zeta potential of NPs

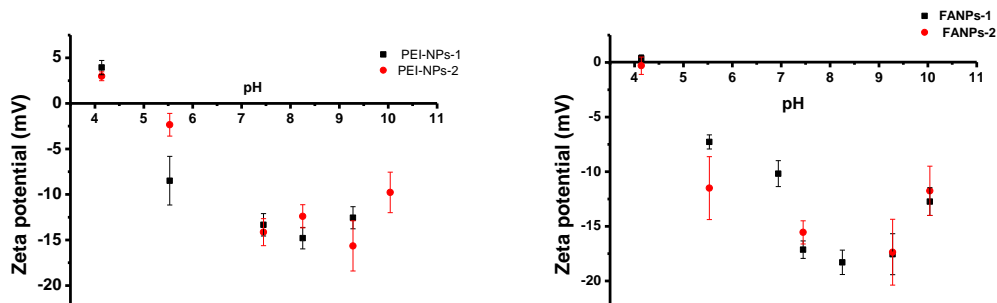

Fig. S7 Zeta potential test of PEI-NPs (right) and FANPs (left) towards pH.

## Cytotoxicity of FANPs

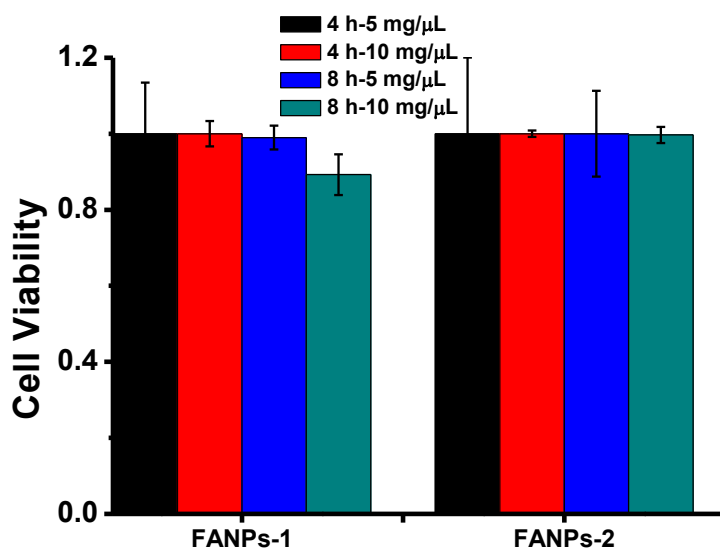

Fig. S8 Cell viability of FANPs towards HeLa cells.

## Confocal images and flow cytometer measurement

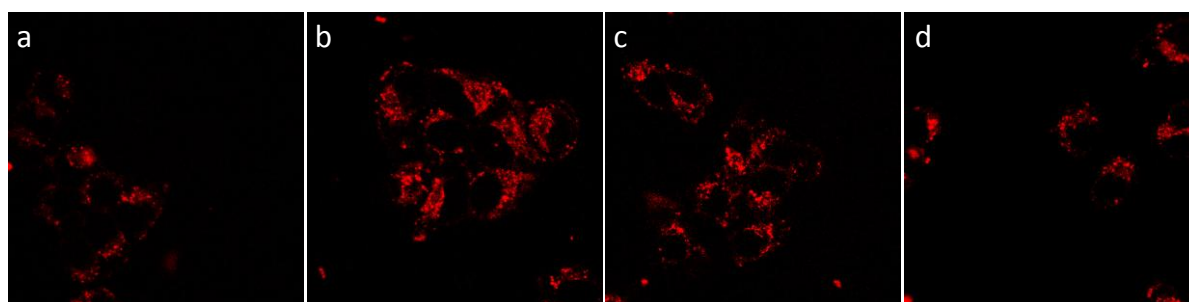

Fig. S9 Confocal images of HeLa cells incubated with FANPs (FANPs-1, FANPs-2, FANPs-3, which prepared using 2% PEI solution of a) 0.1 mL; b) 0.2 mL; c) 0.5 mL respectively) and d) large NPs.

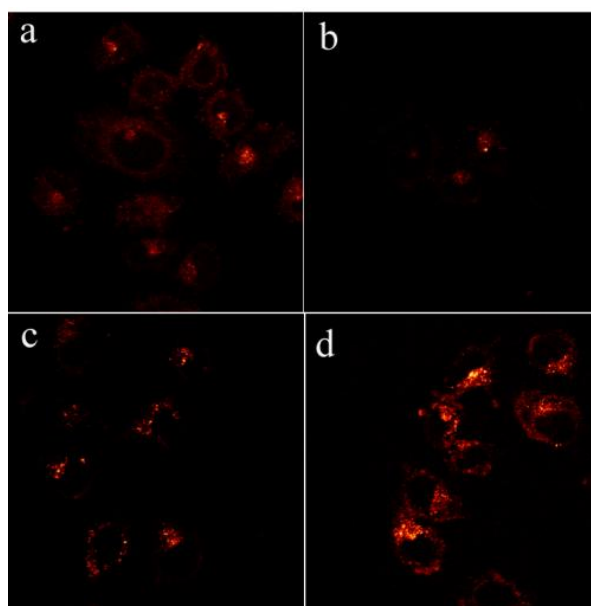

Fig. **S10** Confocal fluorescent microscopy of cancer cell lines following incubation with NPs. MCF-7 Cells were incubated with a) PEI-NPs and b) FANPs-2 for 4 h. HeLa cells were incubated with c) PEI-NPs and d) FANPs-2 for 4 h.

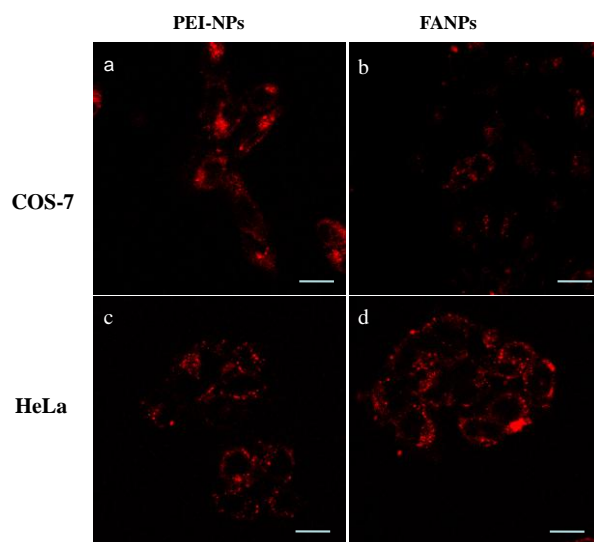

Fig. **S11** Confocal fluorescent microscopy of cancer cell lines following incubation with NPs. COS-7 Cells were incubated with a) PEI-NPs and b) FANPs-2 for 4 h. HeLa cells were incubated with c) PEI-NPs and d) FANPs-2 for 4 h. Scale bar is 20  $\mu\text{m}$ .

Table **S1** Uptake ratio of HeLa and HepG2 cells towards NPs measured by flow cytometer (incubated with NPs at concentration of 10  $\mu\text{g}/\text{mL}$  for 4 h).

| NPs | Cell lines | Uptake Ratio (%) |
|-----|------------|------------------|
|-----|------------|------------------|

|           |       |      |
|-----------|-------|------|
| Control   | HeLa  | 0.37 |
| (no NPs)  | HepG2 | 0.4  |
| FANPs-1   | HeLa  | 1.7  |
| FANPs-2   | HeLa  | 3.6  |
| FANPs-2   | HepG2 | 0.87 |
| large NPs | HeLa  | 2.07 |

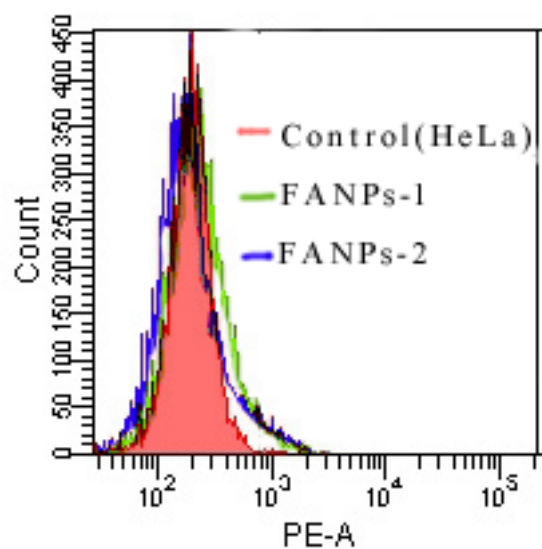

Fig. S12 Flow cytometry data showed the relative cellular uptake of HeLa cells incubated with Control (no NPs), FANPs-1 and FANPs-2 (at concentration of 10  $\mu\text{g}/\text{mL}$  for 4 h).

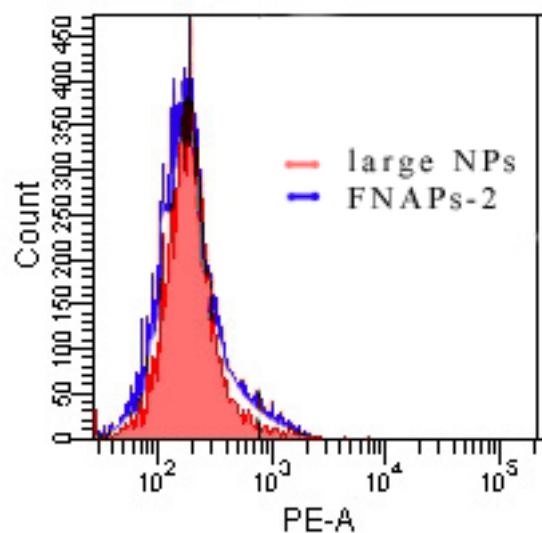

Fig. S13 Flow cytometry data showed the relative cellular uptake of HeLa cells incubated with large NPs and FANPs-2 (at concentration of 10  $\mu\text{g}/\text{mL}$  for 4 h).



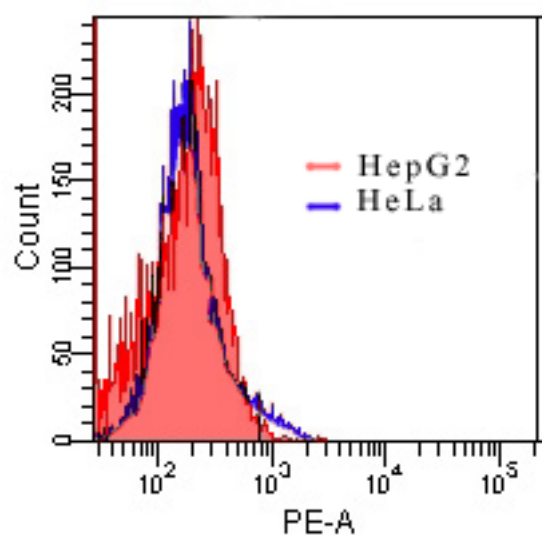

Fig. S14 Flow cytometry data showed the relative cellular uptake of HeLa and HepG2 cells incubated with FANPs-2 (at concentration of 10  $\mu\text{g}/\text{mL}$  for 4 h).
